# Supplementary material
Source: HighWire-hosted journal article supplement (http://www.cmaj.ca/highwire/filestream/68580/field_highwire_adjunct_files/9/161485-res-9-at.pdf)
Supplement: 161485-res-9-at.pdf [file 161485-res-9-at.pdf]

**Appendix 9 (as supplied by the authors):** Comparative risk of incident venous thromboembolism among inflammatory bowel disease patients initiating TNF- $\alpha$  inhibitors versus non-biologic agents in early and late follow-up periods

**Panel A- Pooled estimates for early period\***

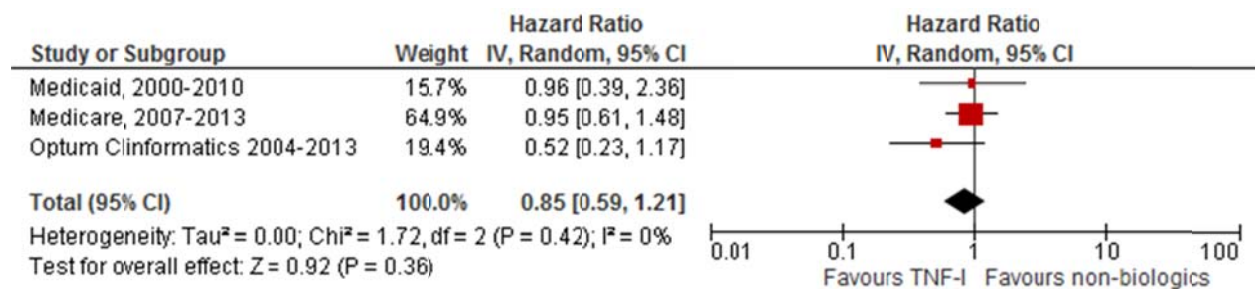

**Panel B- Pooled estimates for late period**

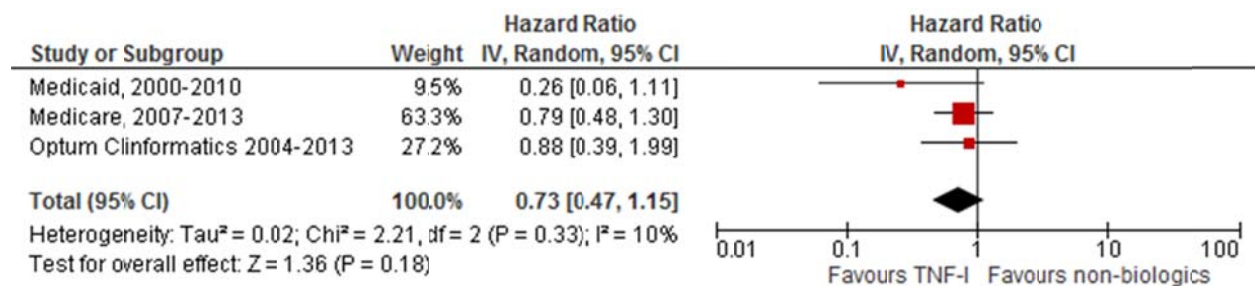

\* Early period defined as 3.5 months for Medicaid and Optum and 5 months for Medicare based on crossing hazard functions in Medicaid and Medicare.
